# Supplementary material
Source: PubMed Central journal article supplement (PMC10399620)
Supplement: NIHMS1915997-supplement-Supplementary_Information.pdf [file NIHMS1915997-supplement-Supplementary_Information.pdf]

**Supplementary Information for:**

**Design and characterization of rapid optogenetic circuits for dynamic control in yeast metabolic engineering**

Evan M. Zhao<sup>1</sup>, Makoto A. Lalwani<sup>1</sup>, Robert J. Lovelett<sup>1,2</sup>, Sergio A. García-Echauri<sup>1</sup>, Shannon M. Hoffman<sup>1</sup>, Christopher L. Gonzalez<sup>1</sup>, Jared E. Toettcher<sup>3</sup>, Ioannis G. Kevrekidis<sup>1,2</sup>, & José L. Avalos<sup>1,3,4,\*</sup>

1. Department of Chemical and Biological Engineering, Hoyt Laboratory 101, Princeton University, William Street, Princeton, NJ 08544, USA
2. Department of Chemical and Biomolecular Engineering, 221 Maryland Hall, 2400 N. Charles Street, Johns Hopkins University, Baltimore, MD 21218, USA
3. Department of Molecular Biology, 140 Lewis Thomas Laboratory, Washington Road, Princeton, NJ 08544, USA
4. The Andlinger Center for Energy and the Environment, Princeton University, 86 Olden Street, Princeton, NJ 08544, USA

\* Correspondence: [javalos@princeton.edu](mailto:javalos@princeton.edu)

## Supplementary discussion on lactic acid fermentation

The enhanced kinetics of OptoINVRT7 allows optimal chemical production to occur at higher cell densities, resulting in higher titers. The optimal  $\rho_s$  for lactic acid production with OptoINVRT2 (YEZ212C) is 3.5, while the optimal  $\rho_s$  with OptoINVRT7 (YEZ212) is 7 (Fig. 4b). Because there are no differences in these strains other than the OptoINVRT circuit they contain, we can conclude that changes in production are solely due to differences in circuit dynamics. Due to its faster light-to-dark kinetics, OptoINVRT7 produces more LDH faster than OptoINVRT2, allowing it to better compete with *PDCI*, even at  $\rho_s$  values higher than 3.5, resulting in higher LA production. By having a higher optimal  $\rho_s$  and thus operating at a higher cell density throughout the fermentation, OptoINVRT7 produces as much as  $53.6 \pm 8.4\%$  more LA than OptoINVRT2 at its optimal  $\rho_s$  (Fig. 4b). Therefore, enabling high lactic acid production at higher  $\rho_s$  compounds higher LDH activity with higher cell density for a significant boost in production.

Furthermore, the rapid induction of LDH afforded by OptoINVRT7 seems to better compensate for the reduced expression of *PDCI* upon switching to dark conditions, compared to OptoINVRT2 (Supplementary Fig. 9c). We observe that for every  $\rho_s$ , the strain with OptoINVRT2 is unable to reach the same final cell density achieved in full light. In contrast, the final cell densities of fermentations with the strain containing OptoINVRT7 operated at  $\rho_s$  of 7.0 or above are much closer to the density achieved in full light (Supplementary Fig. 9c). The activity of LDH involves oxidizing NADH to NAD<sup>+</sup> and can thus replace, to some extent, this metabolic role of Pdc1p that is diminished in the dark. Therefore, by allowing strong induction

of LDH at higher cell densities ( $\rho=7.0-9.5$ ), the strain containing OptoINVRT7 is able to reach almost the same final cell density as in full light (Supplementary Fig. 9c) despite producing less ethanol (Supplementary Fig. 9b) because it produces more LA (Fig. 4b and Supplementary Fig. 9a). This effect of inducing LDH rapidly later in the fermentation, enabled by OptoINVRT7, thus combines higher biomass accumulation with prolonged cell growth in the dark and higher LDH activity for higher LA production.

Another important difference is that OptoINVRT7 is less leaky than OptoINVRT2 when cells are grown under full light (Fig. 1c). The reason is likely the light sensitive degron domain fused to Gal4p, which lowers its basal activity level in the light. This is another advantage of OptoINVRT7 in cases where the product of interest is toxic to the cell and it would be desirable to keep its production repressed during cell growth.

### Supplementary Sequences

Supplementary Sequence 1 - ODCmut:

```
TTTCCCCCGAAGTTGAAGAGCAAGATGACGGGACATTACCTATGTCTTGTGCCAG
GAATCAGGGATGGATAGACACCCAGCTTCTTGTCCAGAAAGGGCCGCATGTGCTTC
AGCCAGGATAAACGTA
```

Supplementary Sequence 2 – P<sub>GAL1-M</sub>:

```
CGGATTAGAAGCCGCCGAGCGGGTGACAGCCCTCCGAAGGAAGACTCTCCTCCGTG
CGTCTCGTCTTCACCGGTCGCGTTCCTGAAACGCAGATGTGCCTCGCGCCGCACTG
CTCCGAACAATAAAGATTCTACAATACTAGCTTTTATGGTTATGAAGAGGAAAAATT
```

GGCAGTAACCTGGTTGGTAAAACCTTCAAATGAACGAATCAAATTAACAACCATAG  
GATGATAATGCGATTAGTTTTTTAGCCTTATTTTAGTAGTAATTAATCAGCGAAGCG  
ATGATTTTTGATCTATTAACAGATATATAAATGCAAAAACCTGCATAACCACTTTAAC  
TAATACTTTCAACATTTTCGGTTTGTATTACTTCTTATTCAAATGTAATAAAAGTATC  
AACAAAAAATTGTTAATATACCTCTATACTTTAACGTCAAGGAGAAAAAACTATA

Supplementary Sequence 3 – P<sub>GAL1-S</sub>:

CGGATTAGAAGCCGCCGAGCGGGTGACAGCCCTCCGAAGGAAGACTCTCCTCCGTG  
CGTCCTCGTCTTCACCGGTCGCGTTCCTGAAACGCAGATGTGCCTCGCGCCGCACTG  
CTCCGAACAATAAAGATTCTACAATACTAGCTTTTATGGTTATGAAGAGGAAAAATT  
GGATGATTTTTGATCTATTAACAGATATATAAATGCAAAAACGGATTAGAAGCCGCC  
GAGCGGGTGACAGCCCTCCGAAGGAAGACTCTCCTCCGTGCGTCTTCACCG  
GTCGCGTTCCTGAAACGCAGATGTGCCTCGCGCCGCACTGCTCCGAACAATAAAGAT  
TCTACAATACTAGCTTTTATGGTTATGAAGAGGAAAAATTGGCAGTAACCTGGTTGG  
TAAACCTTCAAATGAACGAATCAAATTAACAACCATAGGATGATAATGCGATTAG  
TTTTTTAGCCTTATTTTAGTAGTAATTAATCAGCGAAGCGATGATTTTTGATCTATTA  
ACAGATATATAAATGCAAAAACCTGCATAACCACTTTAACTAATACTTTCAACATTTT  
CGGTTTGTATTACTTCTTATTCAAATGTAATAAAAGTATCAACAAAAAATTGTTAAT  
ATACCTCTATACTTTAACGTCAAGGAGAAAAAACTATA

110

111 **Supplementary Table 1.** Plasmids used in study.

| Plasmid                 | Position 1                                           | Position 2                                     | Position 3                                   | Position 4                                    | Position 5                                     | Marker                    | Vector type                   | Source       |
|-------------------------|------------------------------------------------------|------------------------------------------------|----------------------------------------------|-----------------------------------------------|------------------------------------------------|---------------------------|-------------------------------|--------------|
| pJLA121 <sup>0301</sup> | P <sub>PGK1</sub> _MCS_T <sub>CYC1</sub>             | EMPTY                                          | EMPTY                                        | EMPTY                                         | EMPTY                                          | <i>URA3</i>               | 2μ                            | <sup>1</sup> |
| pYZ12-B                 | EMPTY                                                | EMPTY                                          | EMPTY                                        | EMPTY                                         | EMPTY                                          | <i>HIS3</i> <sub>Cg</sub> | <i>HIS3</i> locus Integration | <sup>2</sup> |
| pYZ23                   | EMPTY                                                | EMPTY                                          | EMPTY                                        | EMPTY                                         | EMPTY                                          | Zeocin                    | δ-sites Integration           | <sup>2</sup> |
| EZ-L164                 | P <sub>GAL1</sub> _GFP_<br>T <sub>ADH1</sub>         | EMPTY                                          | EMPTY                                        | EMPTY                                         | EMPTY                                          | <i>HIS3</i> <sub>Cg</sub> | <i>HIS3</i> locus Integration | This Study   |
| EZ-L260                 | P <sub>TEF1</sub> _VP16-EL222_<br>_T <sub>CYC1</sub> | P <sub>C120</sub> _GAL80_<br>T <sub>ACT1</sub> | P <sub>GAL1</sub> _GFP_<br>T <sub>ADH1</sub> | P <sub>PGK1</sub> _GAL4_<br>T <sub>ACT1</sub> | P <sub>C120</sub> _GAL80_<br>T <sub>ADH1</sub> | <i>HIS3</i> <sub>Cg</sub> | <i>HIS3</i> locus Integration | This Study   |
| EZ-L352                 | P <sub>C120</sub> _PDC1_<br>T                        | P <sub>GAL1</sub> -M_                          | EMPTY                                        | EMPTY                                         | EMPTY                                          | Zeocin                    | δ-sites                       | This         |

|          |                                |                                |                                |                                 |                                |                          |                   |       |
|----------|--------------------------------|--------------------------------|--------------------------------|---------------------------------|--------------------------------|--------------------------|-------------------|-------|
|          | ACT1                           | <i>ILV2_T<sub>ADH1</sub></i>   |                                |                                 |                                |                          | integration       | Study |
| EZ-L353  | <i>P<sub>C120_PDC1_T</sub></i> | <i>P<sub>GAL1-M_</sub></i>     | EMPTY                          | EMPTY                           | EMPTY                          | Zeocin                   | $\delta$ -sites   | This  |
|          | ACT1                           | <i>LDH_T<sub>ADH1</sub></i>    |                                |                                 |                                |                          | integration       | Study |
| EZ-L390  | <i>P<sub>PGK1_ILV3_T</sub></i> | <i>P<sub>TEF1_CoxIV_</sub></i> | <i>P<sub>GAL1-M_</sub></i>     | <i>P<sub>TEF1_ILV5_TA</sub></i> | <i>P<sub>TDH3_CoxIV_</sub></i> | <i>URA3</i>              | 2 $\mu$           | This  |
|          | CYC1                           | <i>LlAdhA<sup>RE1</sup>_</i>   | <i>ILV2_T<sub>ADH1</sub></i>   | CT1                             | <i>ARO10_</i>                  |                          |                   | Study |
|          |                                | <i>T<sub>ACT1</sub></i>        |                                |                                 | <i>T<sub>ADH1</sub></i>        |                          |                   |       |
| EZ-L400  | <i>P<sub>TEF1_</sub></i>       | <i>P<sub>C120_GAL80_</sub></i> | <i>P<sub>GAL1_GFP_</sub></i>   | <i>P<sub>C120_GAL80_</sub></i>  | <i>P<sub>PGK1_GAL4_P</sub></i> | <i>HIS3<sub>Cg</sub></i> | <i>HIS3</i> locus | This  |
|          | VP16-EL222                     | <i>CLN2PEST_T</i>              | <i>T<sub>ADH1</sub></i>        | <i>CLN2PEST</i>                 | <i>SD_T<sub>ADH1</sub></i>     |                          | Integration       | Study |
|          | <i>_T<sub>CYC1</sub></i>       | ACT1                           |                                | <i>_T<sub>ACT1</sub></i>        |                                |                          |                   |       |
| EZ-L417  | <i>P<sub>GAL1-S_</sub></i>     | EMPTY                          | EMPTY                          | EMPTY                           | EMPTY                          | <i>URA3</i>              | 2 $\mu$           | This  |
|          | MCS_ <i>T<sub>ADH1</sub></i>   |                                |                                |                                 |                                |                          |                   | Study |
| EZ-L436  | <i>P<sub>TEF1_</sub></i>       | <i>P<sub>C120_GAL80_</sub></i> | <i>P<sub>GAL1-S_GFP_</sub></i> | <i>P<sub>C120_GAL80_</sub></i>  | <i>P<sub>PGK1_GAL4_P</sub></i> | <i>HIS3<sub>Cg</sub></i> | <i>HIS3</i> locus | This  |
|          | VP16-EL222                     | <i>ODCmut_</i>                 | <i>T<sub>ADH1</sub></i>        | <i>ODCmut_T<sub>ACT</sub></i>   | <i>SD_T<sub>ADH1</sub></i>     |                          | Integration       | Study |
|          | <i>_T<sub>CYC1</sub></i>       | <i>T<sub>ACT1</sub></i>        |                                | 1                               |                                |                          |                   |       |
| EZ-L437C | <i>P<sub>TEF1_</sub></i>       | <i>P<sub>C120_GAL80_</sub></i> | <i>P<sub>GAL1_GFP_</sub></i>   | <i>P<sub>C120_GAL80_</sub></i>  | <i>P<sub>PGK1_GAL4_P</sub></i> | <i>HIS3<sub>Cg</sub></i> | <i>HIS3</i> locus | This  |
|          |                                |                                |                                |                                 |                                |                          | Integration       |       |

|         |                                                         |                                                                   |                                                |                                                                   |                                                                   |                           |                                  |               |
|---------|---------------------------------------------------------|-------------------------------------------------------------------|------------------------------------------------|-------------------------------------------------------------------|-------------------------------------------------------------------|---------------------------|----------------------------------|---------------|
|         | VP16-EL222<br>_T <sub>CYC1</sub>                        | <i>ODCmut</i> _<br>T <sub>ACT1</sub>                              | T <sub>ADH1</sub>                              | <i>ODCmut</i> _<br>T <sub>ACT1</sub>                              | SD_T <sub>ADH1</sub>                                              |                           |                                  | Study         |
| EZ-L437 | P <sub>TEF1</sub> _<br>VP16-EL222<br>_T <sub>CYC1</sub> | P <sub>C120_GAL80</sub> _<br><i>ODCmut</i> _<br>T <sub>ACT1</sub> | P <sub>GAL1-M</sub> _<br>GFP_T <sub>ADH1</sub> | P <sub>C120_GAL80</sub> _<br><i>ODCmut</i> _<br>T <sub>ACT1</sub> | P <sub>PGK1_GAL4</sub> _P<br>SD_T <sub>ADH1</sub>                 | <i>HIS3</i> <sub>Cg</sub> | <i>HIS3</i> locus<br>Integration | This<br>Study |
| EZ-L439 | P <sub>TEF1</sub> _VP16-<br>EL222_T <sub>CYC1</sub>     | P <sub>C120_GAL80</sub> _<br><i>ODCmut</i> _<br>T <sub>ACT1</sub> | EMPTY                                          | P <sub>PGK1_GAL4</sub> _P<br>SD_T <sub>ADH1</sub>                 | P <sub>C120_GAL80</sub> _<br><i>ODCmut</i> _<br>T <sub>ACT1</sub> | <i>HIS3</i> <sub>Cg</sub> | <i>HIS3</i> locus<br>Integration | This<br>Study |
| EZ-L559 | P <sub>ADH2_GFP</sub> _<br>T <sub>ADH1</sub>            | EMPTY                                                             | EMPTY                                          | EMPTY                                                             | EMPTY                                                             | <i>HIS3</i> <sub>Cg</sub> | <i>HIS3</i> locus<br>Integration | This<br>Study |
| EZ-L561 | P <sub>MET3_GFP</sub> _<br>T <sub>ADH1</sub>            | EMPTY                                                             | EMPTY                                          | EMPTY                                                             | EMPTY                                                             | <i>HIS3</i> <sub>Cg</sub> | <i>HIS3</i> locus<br>Integration | This<br>Study |
| EZ-L571 | P <sub>TEF1</sub> _<br>VP16-EL222<br>_T <sub>CYC1</sub> | P <sub>C120_GAL80</sub> _<br>T <sub>ADH1</sub>                    | EMPTY                                          | P <sub>ADH1_GAL4</sub> _<br>T <sub>ACT1</sub>                     | P <sub>C120_GAL80</sub> _<br>T <sub>ADH1</sub>                    | <i>HIS3</i> <sub>Cg</sub> | <i>HIS3</i> locus<br>Integration | This<br>Study |

|         |                                                           |                                                     |       |                                                    |       |                          |                                  |               |
|---------|-----------------------------------------------------------|-----------------------------------------------------|-------|----------------------------------------------------|-------|--------------------------|----------------------------------|---------------|
| EZ-L827 | P <sub>C120_PDC1_T</sub><br>ACT1                          | P <sub>GAL1-S_</sub><br><i>LDH_T<sub>ADH1</sub></i> | EMPTY | EMPTY                                              | EMPTY | Zeocin                   | δ-sites<br>Integration           | This<br>Study |
| pMAL81  | P <sub>PGK1_LexA-</sub><br>hER-B112_<br>T <sub>CYC1</sub> | P <sub>9xLexA_CYC1_G</sub><br>FP_T <sub>ADH1</sub>  | EMPTY | EMPTY                                              | EMPTY | <i>HIS3<sub>Cg</sub></i> | <i>HIS3</i> locus<br>Integration | This<br>Study |
| pMAL125 | P <sub>PGK1_LexA-</sub><br>hER-VP16_<br>T <sub>CYC1</sub> | P <sub>9xLexA_CYC1_G</sub><br>FP_T <sub>ADH1</sub>  | EMPTY | EMPTY                                              | EMPTY | <i>HIS3<sub>Cg</sub></i> | <i>HIS3</i> locus<br>Integration | This<br>Study |
| pMAL140 | P <sub>6xtetO_tTA_</sub><br>T <sub>ACT1</sub>             | EMPTY                                               | EMPTY | P <sub>7xtetO_CYC1_GF</sub><br>P_T <sub>ADH1</sub> | EMPTY | <i>HIS3<sub>Cg</sub></i> | <i>HIS3</i> locus<br>Integration | This<br>Study |

112 MCS = Multiple cloning sites; Gene positions are mapped on the general plasmid structure shown in Supplementary Fig. 12.

113 Intergenic distances are as previously described.<sup>1</sup>

114

115

116

117



118 **Supplementary Table 2. Yeast strains used in study**

| Strain Name | Genotype                                                                                                                                                                                                                                        | Source     |
|-------------|-------------------------------------------------------------------------------------------------------------------------------------------------------------------------------------------------------------------------------------------------|------------|
| BY4741      | S288C <i>MATa his3Δ1 leu2Δ0 met15Δ0 ura3Δ0</i>                                                                                                                                                                                                  | 3          |
| CEN.PK2-1C  | <i>MATa his3Δ1 leu2-3_112 trp1-289 ura3-53</i>                                                                                                                                                                                                  | 4          |
| Y202        | <i>S288C gal80::KanMX, pdc1Δ, pdc5Δ, pdc6Δ + pJLA121-PDC1<sup>0202</sup></i>                                                                                                                                                                    | 2          |
| YEZ25       | CEN.PK2-1C <i>gal80::KanMX</i>                                                                                                                                                                                                                  | This Study |
| YEZ44       | CEN.PK2-1C <i>gal80::KanMX, gal4::HygB</i>                                                                                                                                                                                                      | 2          |
| YEZ48       | CEN.PK2-1C <i>HIS3<sub>Cg</sub>::P<sub>GAL1</sub>_GFP_T<sub>ADH1</sub></i>                                                                                                                                                                      | This Study |
| YEZ94       | Y202 <i>HIS3<sub>Cg</sub>::P<sub>PGK1</sub>_VP16-EL222_T<sub>CYC1</sub></i>                                                                                                                                                                     | 2          |
| YEZ100      | YEZ44 <i>HIS3<sub>Cg</sub>::(P<sub>TEF1</sub>_VP16-EL222_T<sub>CYC1</sub>, P<sub>C120</sub>_GAL80_T<sub>ACT1</sub>, P<sub>GAL1</sub>_GFP_T<sub>ADH1</sub>, P<sub>C120</sub>_GAL80_T<sub>ADH1</sub>, P<sub>ADH1</sub>_GAL4_T<sub>ACT1</sub>)</i> | 2          |
| YEZ101      | YEZ44 <i>HIS3<sub>Cg</sub>::(P<sub>TEF1</sub>_VP16-EL222_T<sub>CYC1</sub>, P<sub>C120</sub>_GAL80_T<sub>ACT1</sub>, P<sub>GAL1</sub>_GFP_T<sub>ADH1</sub>, P<sub>C120</sub>_GAL80_T<sub>ADH1</sub>, P<sub>PGK1</sub>_GAL4_T<sub>ACT1</sub>)</i> | 2          |

|         |                                                                                                                                                                                                                                                                                           |            |
|---------|-------------------------------------------------------------------------------------------------------------------------------------------------------------------------------------------------------------------------------------------------------------------------------------------|------------|
| YEZ102  | YEZ44 <i>HIS3</i> <sub>Cg</sub> ::(P <sub>TEF1</sub> _VP16-EL222 _T <sub>CYC1</sub> , P <sub>C120</sub> _GAL80_T <sub>ACT1</sub> , P <sub>GAL1</sub> _GFP_T <sub>ADH1</sub> , P <sub>C120</sub> _GAL80_T <sub>ADH1</sub> , P <sub>PGK1</sub> _GAL4_PSD_T <sub>ACT1</sub> )                | 2          |
| YEZ140  | CEN.PK2-1C <i>HIS3</i> <sub>cg</sub>                                                                                                                                                                                                                                                      | 2          |
| YEZ171  | Y202 <i>HIS3</i> <sub>Cg</sub> ::P <sub>TEF1</sub> _GFP_T <sub>CYC1</sub>                                                                                                                                                                                                                 | 2          |
| YEZ186  | CEN.PK2-1C <i>HIS3</i> <sub>Cg</sub> ::P <sub>TEF1</sub> _GFP_T <sub>CYC1</sub>                                                                                                                                                                                                           | 2          |
| YEZ200  | Y202 <i>gal80Δ</i> :: <i>KanMX</i> , <i>gpd1Δ</i> :: <i>HygB</i> , <i>pdc1Δ</i> , <i>pdc5Δ</i> , <i>pdc6Δ</i> + <i>pJLA121-PDC1</i> <sup>0202</sup>                                                                                                                                       | This Study |
| YEZ203  | YEZ200 <i>pdc1Δ</i> , <i>pdc5Δ</i> , <i>pdc6Δ gal80Δ gpd1Δ</i> + <i>pJLA121-PDC1</i> <sup>0202</sup>                                                                                                                                                                                      | This Study |
| YEZ207  | YEZ203 <i>HIS3</i> <sub>Cg</sub> ::(P <sub>TEF1</sub> _VP16-EL222 _T <sub>CYC1</sub> , P <sub>C120</sub> _GAL80_ODCmut_T <sub>ACT1</sub> , P <sub>C120</sub> _GAL80_ODCmut_T <sub>ADH1</sub> , P <sub>PGK1</sub> _GAL4_PSD_T <sub>ACT1</sub> )                                            | This Study |
| YEZ207C | YEZ203 <i>HIS3</i> <sub>Cg</sub> ::(P <sub>TEF1</sub> _VP16-EL222 _T <sub>CYC1</sub> , P <sub>C120</sub> _GAL80_T <sub>ACT1</sub> , P <sub>GAL1</sub> _GFP_T <sub>ADH1</sub> , P <sub>C120</sub> _GAL80_T <sub>ADH1</sub> , P <sub>PGK1</sub> _GAL4_T <sub>ACT1</sub> )                   | This Study |
| YEZ209  | Y202 <i>HIS3</i> <sub>Cg</sub> ::(P <sub>TEF1</sub> _VP16-EL222 _T <sub>CYC1</sub> , P <sub>C120</sub> _GAL80_ODCmut_T <sub>ACT1</sub> , P <sub>GAL1-S</sub> _GFP_T <sub>ADH1</sub> , P <sub>C120</sub> _GAL80_ODCmut_T <sub>ADH1</sub> , P <sub>PGK1</sub> _GAL4_PSD_T <sub>ACT1</sub> ) | This Study |

|          |                                                                                                                                                                                                                                                                                                 |               |
|----------|-------------------------------------------------------------------------------------------------------------------------------------------------------------------------------------------------------------------------------------------------------------------------------------------------|---------------|
| YEZ210   | Y202 <i>HIS3</i> <sub>Cg</sub> ::(P <sub>TEF1</sub> _VP16-EL222 _T <sub>CYC1</sub> , P <sub>C120</sub> _GAL80_ODCmut_T <sub>ACT1</sub> , P <sub>GAL1-M</sub> _GFP_T <sub>ADH1</sub> ,<br>P <sub>C120</sub> _GAL80_ODCmut_T <sub>ADH1</sub> , P <sub>PGK1</sub> _GAL4_PSD_T <sub>ACT1</sub> )    | This<br>Study |
| YEZ210C  | Y202 <i>HIS3</i> <sub>Cg</sub> ::(P <sub>TEF1</sub> _VP16-EL222 _T <sub>CYC1</sub> , P <sub>C120</sub> _GAL80_ODCmut_T <sub>ACT1</sub> , P <sub>GAL1</sub> _GFP_T <sub>ADH1</sub> ,<br>P <sub>C120</sub> _GAL80_ODCmut_T <sub>ADH1</sub> , P <sub>PGK1</sub> _GAL4_PSD_T <sub>ACT1</sub> )      | This<br>Study |
| YEZ212   | YEZ207 YARCDelta5::(P <sub>C120</sub> _PDC1_T <sub>ACT1</sub> ,<br>P <sub>GAL1-M</sub> _LDH_T <sub>ADH1</sub> ) minus <i>pJLA121-PDC1</i> <sup>0202</sup>                                                                                                                                       | This<br>Study |
| YEZ212C  | YEZ207C YARCDelta5::(P <sub>C120</sub> _PDC1_T <sub>ACT1</sub> ,<br>P <sub>GAL1-M</sub> _LDH_T <sub>ADH1</sub> ) minus <i>pJLA121-PDC1</i> <sup>0202</sup>                                                                                                                                      | This<br>Study |
| YEZ228   | CEN.PK2-1C <i>HIS3</i> <sub>Cg</sub> ::P <sub>TDH3</sub> _GFP_T <sub>ADH1</sub>                                                                                                                                                                                                                 | This<br>Study |
| YEZ229   | YEZ25 <i>HIS3</i> <sub>Cg</sub> ::(P <sub>TEF1</sub> _VP16-EL222 _T <sub>CYC1</sub> , P <sub>C120</sub> _GAL80_ODCmut_T <sub>ACT1</sub> , P <sub>GAL1-S</sub> _GFP_T <sub>ADH1</sub> ,<br>P <sub>C120</sub> _GAL80_ODCmut_T <sub>ADH1</sub> , P <sub>PGK1</sub> _GAL4_PSD_T <sub>ACT1</sub> )   | This<br>Study |
| YEZ230   | YEZ25 <i>HIS3</i> <sub>Cg</sub> ::(P <sub>TEF1</sub> _VP16-EL222 _T <sub>CYC1</sub> , P <sub>C120</sub> _GAL80_ODCmut_T <sub>ACT1</sub> , P <sub>GAL1-M</sub> _GFP_T <sub>ADH1</sub> ,<br>P <sub>C120</sub> _GAL80_ODCmut_T <sub>ADH1</sub> , P <sub>PGK1</sub> _GAL4_PSD_T <sub>ACT1</sub> )   | This<br>Study |
| YEZ230-5 | YEZ25 <i>HIS3</i> <sub>Cg</sub> ::(P <sub>TEF1</sub> _VP16-EL222 _T <sub>CYC1</sub> , P <sub>C120</sub> _GAL80_CLN2PEST_T <sub>ACT1</sub> , P <sub>GAL1</sub> _GFP_T <sub>ADH1</sub> ,<br>P <sub>C120</sub> _GAL80_CLN2PEST_T <sub>ACT1</sub> , P <sub>PGK1</sub> _GAL4_PSD_T <sub>ADH1</sub> ) | This<br>Study |

|         |                                                                                                                                                                                                                                                                                         |            |
|---------|-----------------------------------------------------------------------------------------------------------------------------------------------------------------------------------------------------------------------------------------------------------------------------------------|------------|
| YEZ230C | YEZ25 <i>HIS3</i> <sub>Cg</sub> ::(P <sub>TEF1</sub> _VP16-EL222_T <sub>CYC1</sub> , P <sub>C120</sub> _GAL80_ODCmut_T <sub>ACT1</sub> , P <sub>GALI</sub> _GFP_T <sub>ADH1</sub> , P <sub>C120</sub> _GAL80_ODCmut_T <sub>ADH1</sub> , P <sub>PGK1</sub> _GAL4_PSD_T <sub>ACT1</sub> ) | This Study |
| YEZ235  | CEN.PK2-1C <i>gpd1Δ</i> ::HygB, <i>pdc1Δ</i> , <i>pdc5Δ</i> , <i>pdc6Δ</i> <i>gal80Δ</i> <i>ald6Δ</i> <i>bat1Δ</i> + <i>pJLA121-PDC1</i> <sup>0202</sup>                                                                                                                                | This Study |
| YEZ294  | CEN.PK2-1C <i>HIS3</i> <sub>Cg</sub> ::P <sub>ADH2</sub> _GFP_T <sub>ADH1</sub>                                                                                                                                                                                                         | This Study |
| YEZ295  | CEN.PK2-1C <i>HIS3</i> <sub>Cg</sub> ::P <sub>MET31</sub> _GFP_T <sub>ADH1</sub>                                                                                                                                                                                                        | This Study |
| YEZ531  | YEZ235 <i>HIS3</i> <sub>Cg</sub> ::(P <sub>TEF1</sub> _VP16-EL222_T <sub>CYC1</sub> , P <sub>C120</sub> _GAL80_T <sub>ADH1</sub> , P <sub>ADH1</sub> _GAL4_T <sub>ACT1</sub> , P <sub>C120</sub> _GAL80_T <sub>ADH1</sub> )                                                             | This Study |
| YEZ532  | YEZ235 <i>HIS3</i> <sub>Cg</sub> ::(P <sub>TEF1</sub> _VP16-EL222_T <sub>CYC1</sub> , P <sub>C120</sub> _GAL80_ODCmut_T <sub>ACT1</sub> , P <sub>C120</sub> _GAL80_ODCmut_T <sub>ADH1</sub> , P <sub>PGK1</sub> _GAL4_PSD_T <sub>ACT</sub> )                                            | This Study |
| YEZ535  | YEZ531 YARCdelta5::(P <sub>C120</sub> _PDC1_T <sub>ACT1</sub> , P <sub>GALI-M</sub> _ILV2_T <sub>ADH1</sub> ) minus <i>pJLA121-PDC1</i> <sup>0202</sup>                                                                                                                                 | This Study |
| YEZ536  | YEZ532 YARCdelta5::(P <sub>C120</sub> _PDC1_T <sub>ACT1</sub> , P <sub>GALI-M</sub> _ILV2_T <sub>ADH1</sub> ) minus <i>pJLA121-PDC1</i> <sup>0202</sup>                                                                                                                                 | This Study |

|          |                                                                                                                           |            |
|----------|---------------------------------------------------------------------------------------------------------------------------|------------|
| YEZ544-1 | YEZ535 + EZ-L390                                                                                                          | This Study |
| YEZ546-2 | YEZ536 + EZ-L390                                                                                                          | This Study |
| YEZ597-5 | YEZ207C YARCdelta5::( $P_{C120\_PDC1\_T_{ACT1}}$ , $P_{GAL1-S\_LDH\_T_{ADH1}}$ ) minus <i>pJLA121-PDC1<sup>0202</sup></i> | This Study |
| YEZ598-4 | YEZ207 YARCdelta5::( $P_{C120\_PDC1\_T_{ACT1}}$ , $P_{GAL1-S\_LDH\_T_{ADH1}}$ ) minus <i>pJLA121-PDC1<sup>0202</sup></i>  | This Study |
| YEZ636   | CEN.PK2-1C <i>HIS3<sub>Cg</sub></i> :: $P_{GAL1-S\_GFP\_T_{ADH1}}$                                                        | This Study |
| yMAL34   | CEN.PK2-1C <i>HIS3<sub>Cg</sub></i> :: $P_{PGK1\_LexA-hER-B112\_T_{CYC1}}$ , $P_{9xLexA\_CYC1\_GFP\_T_{ADH1}}$            | This Study |
| yMAL35   | CEN.PK2-1C <i>HIS3<sub>Cg</sub></i> :: $P_{PGK1\_LexA-hER-VP16\_T_{CYC1}}$ , $P_{9xLexA\_CYC1\_GFP\_T_{ADH1}}$            | This Study |
| yMAL36   | CEN.PK2-1C <i>HIS3<sub>Cg</sub></i> :: $P_{6xtetO\_tTA\_T_{ACT1}}$ , $P_{7xtetO\_CYC1\_GFP\_T_{ADH1}}$                    | This Study |

119

120

121 **Supplementary Figures:**

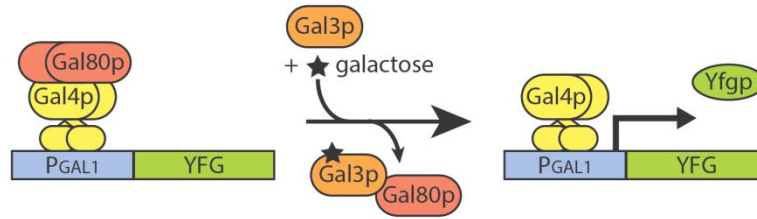

122

123 **Supplementary Figure 1. The endogenous galactose regulation system**

124 In carbon sources other than galactose, Gal80p represses Gal4p activation of genes controlled by  
125  $P_{GAL1}$ . When the cells are grown in galactose, Gal3p is allosterically activated by galactose and  
126 binds to Gal80p to carry it out of the nucleus. Gal4p is also more highly expressed in galactose  
127 media.

128

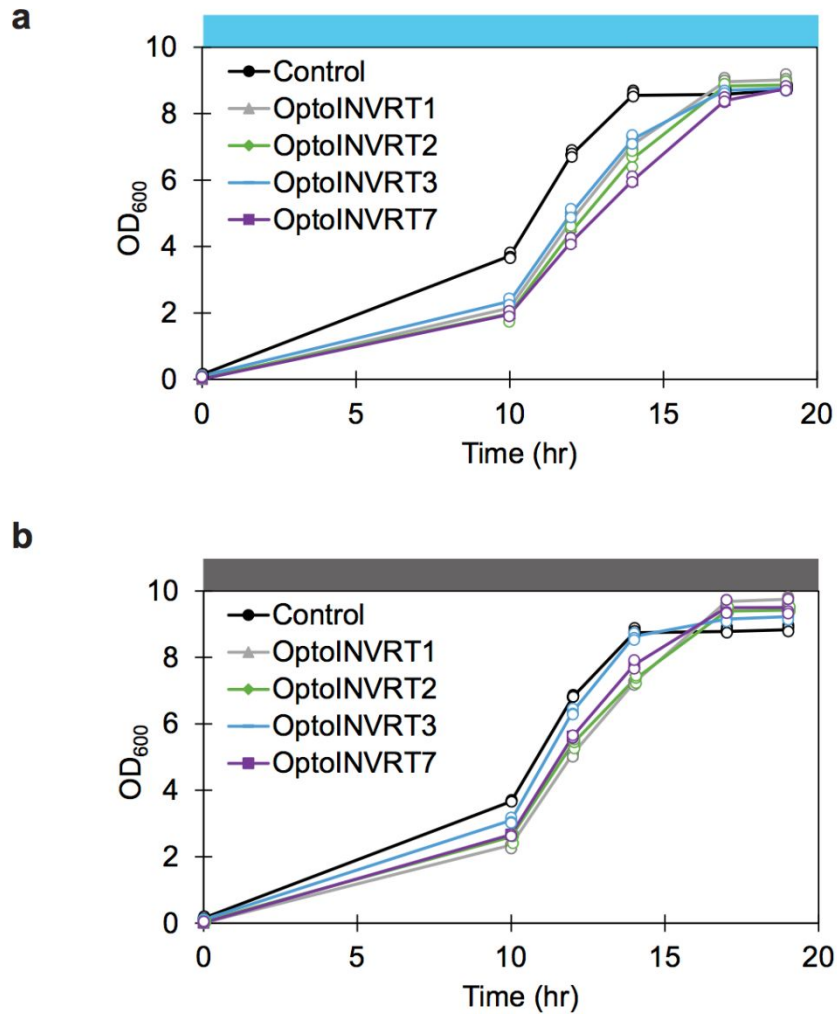

129

130 **Supplementary Figure 2. Impact of OptoINVRT circuits on cell growth.**

131 Growth curves of cells containing OptoINVRT1 (YEZ100), OptoINVRT2 (YEZ101),  
 132 OptoINVRT3 (YEZ102), and OptoINVRT7 (YEZ230C), compared to a wild type control  
 133 (YEZ140) in full blue light (**a**) and dark (**b**) conditions. Data points of three independent  
 134 replicates are shown.

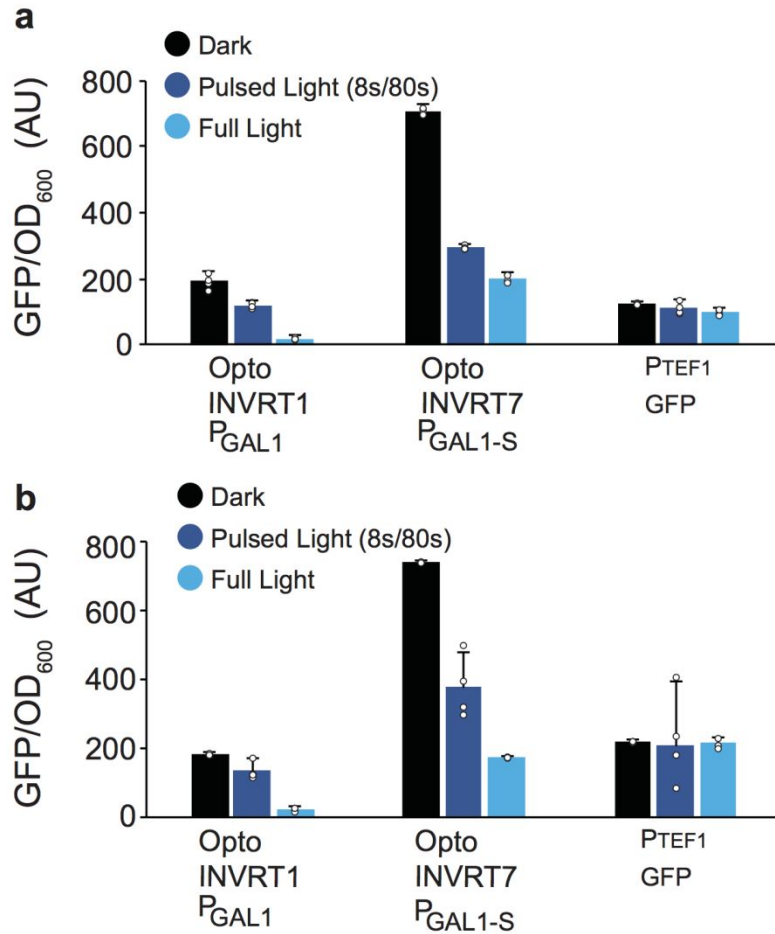

135

136 **Supplementary Figure 3. Activity of OptoINVRT circuits and  $P_{GAL1-S}$  in different carbon**  
 137 **sources**

138 Activity of OptoINVRT1- $P_{GAL1}$  (YEZ100) and OptoINVRT7- $P_{GAL1-S}$  (YEZ229) in 2% ethanol (**a**)  
 139 or 2% glycerol (**b**) as sole carbon sources. For all experiments, a positive control strain  
 140 expressing GFP under  $P_{TEF1}$  (YEZ186) was included in each repeat, and YEZ140 (no GFP  
 141 control) was used to subtract background and auto-fluorescence. All data are shown as mean  
 142 values; dots represent individual data points; error bars represent the s.d. of four biologically  
 143 independent 1-ml sample replicates exposed to the same conditions. All experiments were  
 144 repeated at least three times.



145

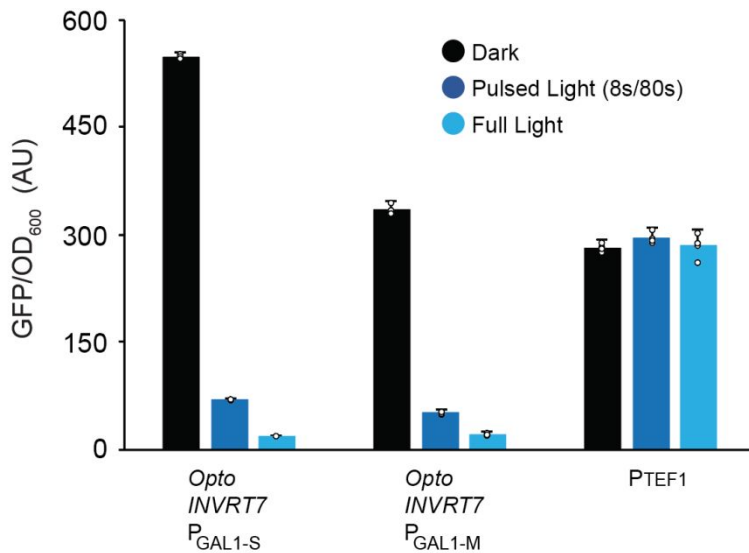

146

147 **Supplementary Figure 4. Activity of OptoINVRT7 and P<sub>GAL1</sub> engineered promoters in a**  
148 **yeast S288C (BY4741) background strain (Y202)**

149 Specific expression of GFP using OptoINVRT7 with P<sub>GAL1-S</sub> (YEZ209) or P<sub>GAL1-M</sub> (YEZ210) in  
150 an S288C background strain (Y202; S288C, *pdc1*Δ, *pdc5*Δ, *pdc6*Δ, *gal80*Δ containing  
151 pJLA121PDC1<sup>0202</sup>), compared to constitutive expression using P<sub>TEF1</sub> (YEZ171) in the same  
152 background. This background is used for lactic acid and isobutanol production. YEZ94 (no GFP  
153 control) was used to subtract background and auto-fluorescence. All data are shown as mean  
154 values; dots represent individual data points; error bars represent the s.d. of four biologically  
155 independent 1-ml sample replicates exposed to the same conditions. All experiments were  
156 repeated at least three times.

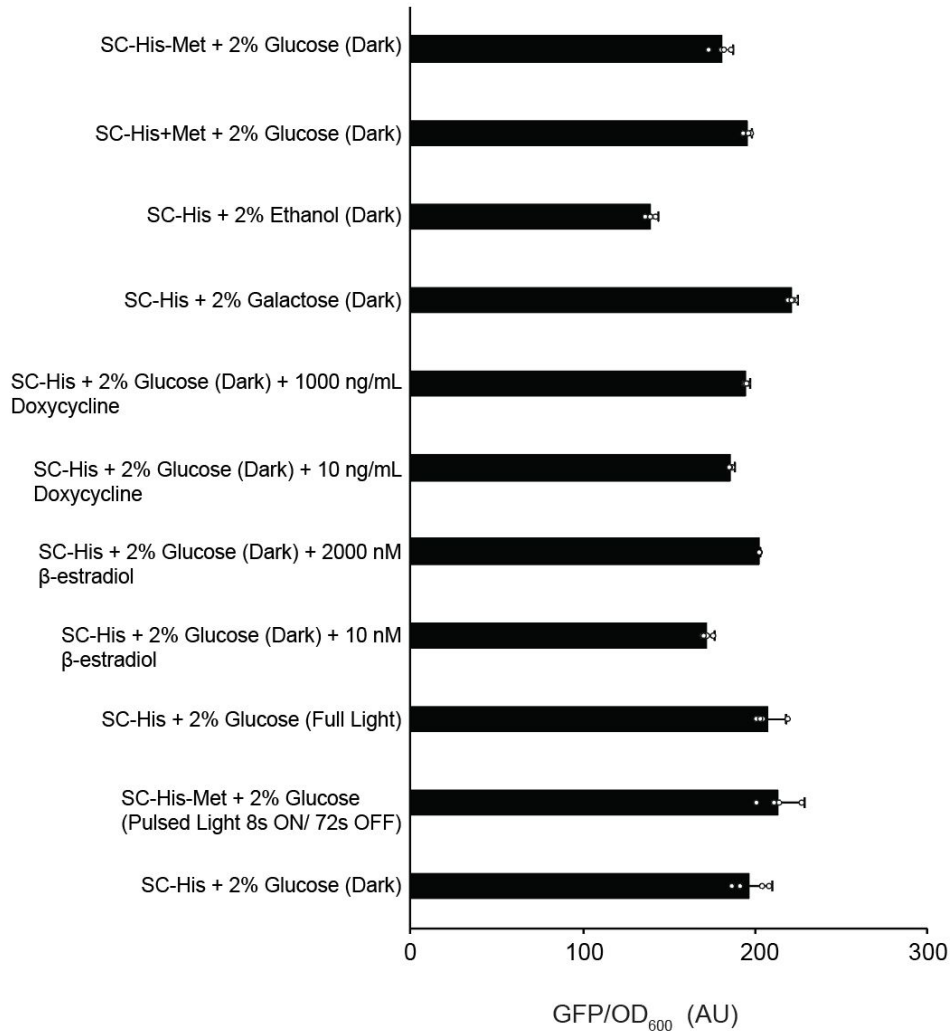

157

158 **Supplementary Figure 5. GFP expression using  $P_{TEF1}$  in different conditions**

159 Specific expression of GFP using  $P_{TEF1}$  in different media and light conditions, used as controls

160 for experiments shown in Figure 1d. YEZ186 ( $P_{TEF1}$ -GFP) was grown in different media and

161 light conditions. YEZ140 (no GFP control) was used to subtract background and auto-

162 fluorescence. All data are shown as mean values; dots represent individual data points; error bars

163 represent the s.d. of four biologically independent 1-ml sample replicates exposed to the same

164 conditions. All experiments were repeated at least three times.

165

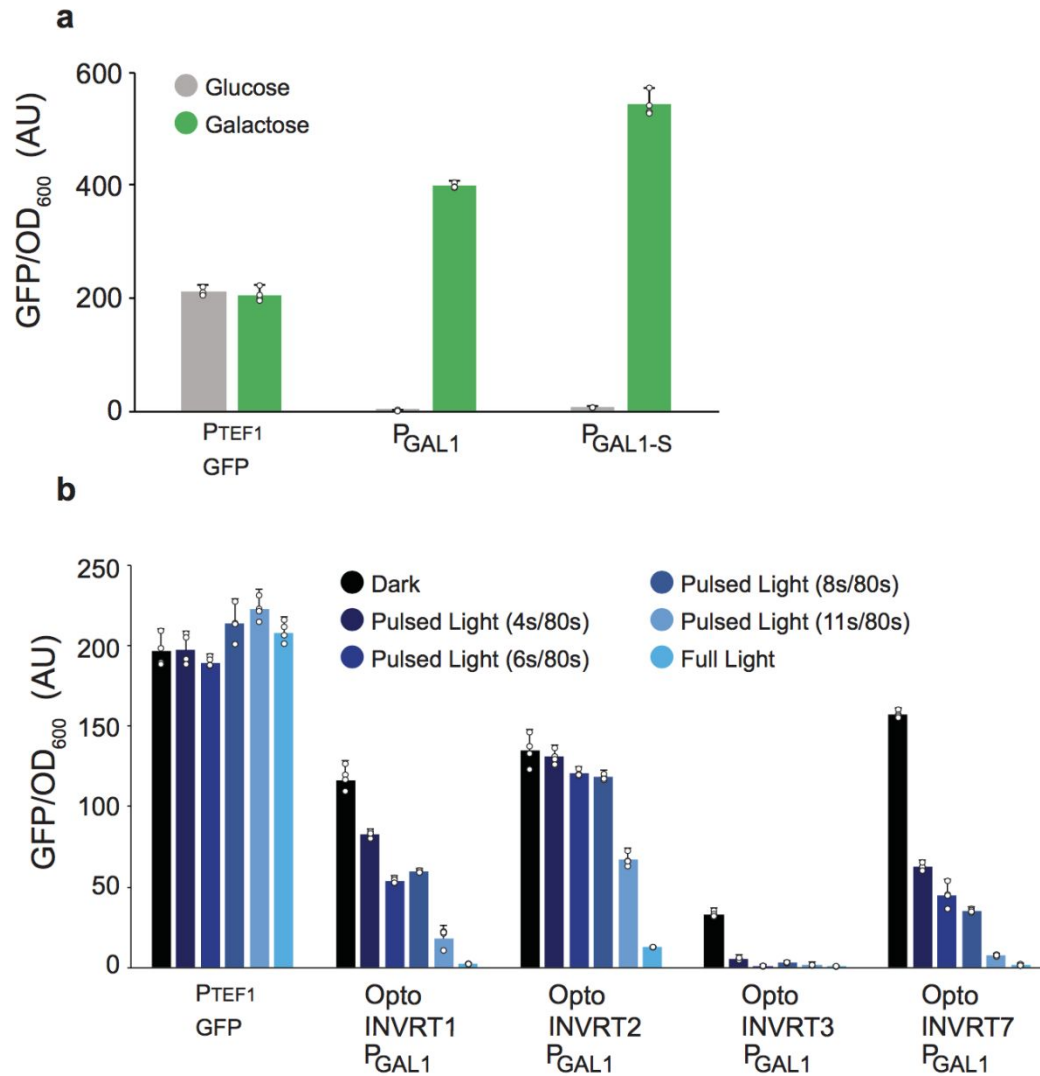

166

167 **Supplementary Figure 6. Activation of P<sub>GAL1-S</sub> in galactose and light-tunability of**

168 **OptoINVRT Circuits**

169 **(a)** Light-independent activation of P<sub>GAL1-S</sub> by galactose: strains expressing GFP under P<sub>GAL1</sub>

170 (YEZ48) or P<sub>GAL1-S</sub> (YEZ636), without any optogenetic circuit, grown in either 2% glucose or 2%

171 galactose as sole carbon sources. **(b)** Response of different OptoINVRT circuits to different duty

172 cycles of light. Circuits were compared in CENPK.2-1C-derived (*gal80Δ*, *gal4Δ* for

173 OptoINVRT1,2,3; *gal80Δ* for OptoINVRT5,7) strains: YEZ100 (OptoINVRT1), YEZ101

174 (OptoINVRT2), YEZ102 (OptoINVRT3), YEZ230-5 (OptoINVRT5) and YEZ230C  
175 (OptoINVRT7). Specific expression of GFP under constitutive  $P_{TEF1}$  (YEZ186) is shown as  
176 control. YEZ140 (no GFP control) was used to subtract background and auto-fluorescence. All  
177 data are shown as mean values; dots represent individual data points; error bars represent the s.d.  
178 of four biologically independent 1-ml sample replicates exposed to the same conditions. All  
179 experiments were repeated at least three times.  
180

**a**

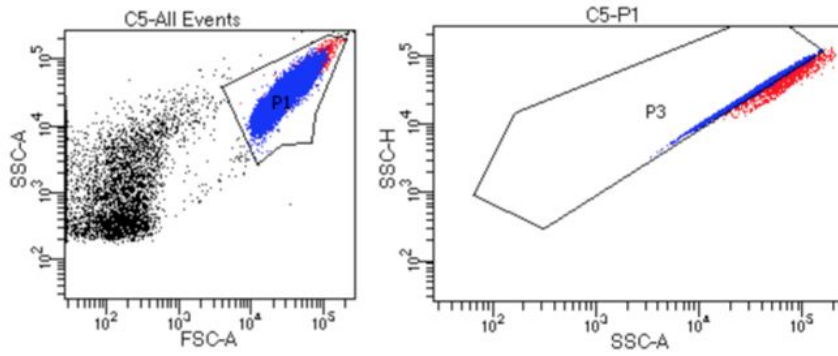

**b**

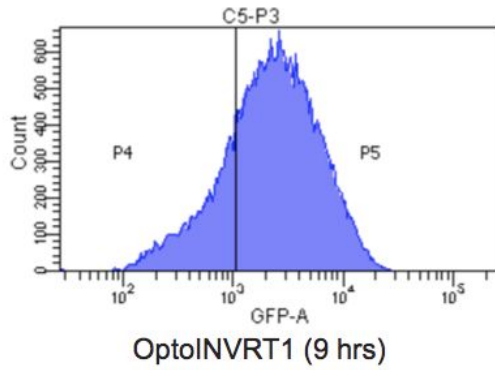

**c**

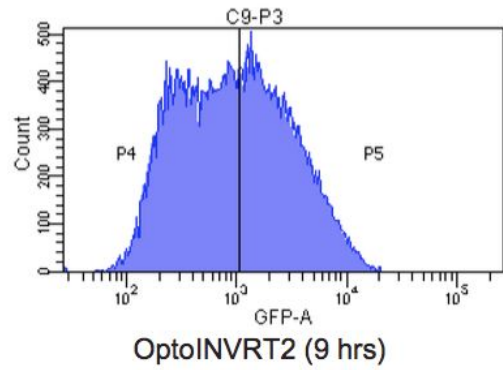

**d**

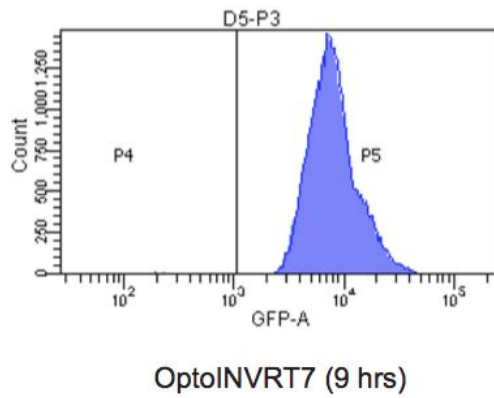

**e**

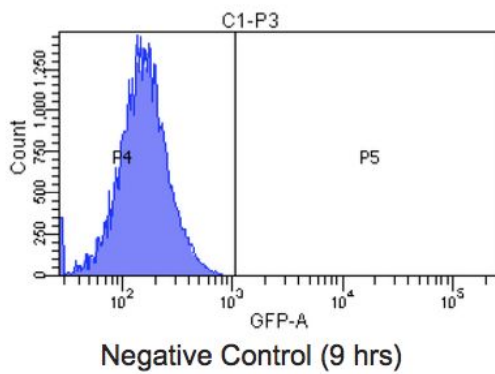

**f**

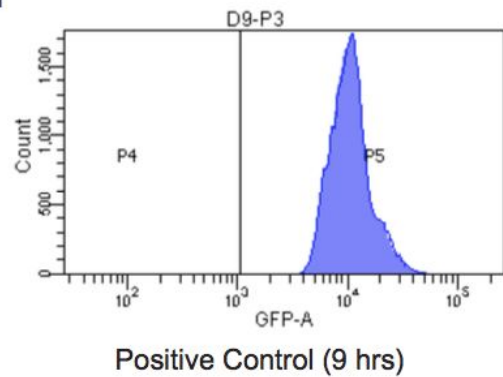

182 **Supplementary Figure 7. Flow cytometry histograms**

183 **(a)** The FSC vs. SSC plot shows the gating for isolating yeast cell events (left panel), while the  
184 SSC-H vs. SSC-A plot shows the gating for isolating single cell events (right panel). **(b-f)**  
185 Representative histograms of GFP expression for OptoINVRT1 **(b)**, OptoINVRT2 **(c)**,  
186 OptoINVRT7 **(d)**, negative control **(e)**, and positive control **(f)** measured 9 hours after induction  
187 of gene expression, corresponding to the data shown in Figure 3.

188

189

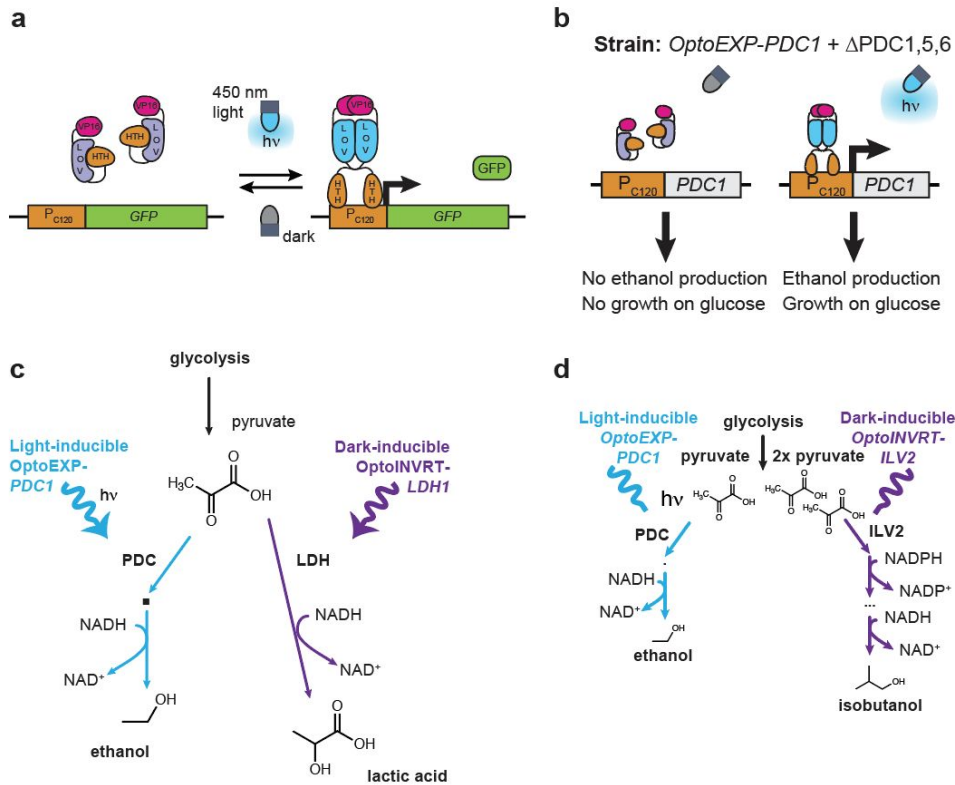

192 **Supplementary Figure 8. Schematics for OptoEXP and biosynthetic pathways**

193 (a) Mechanism of OptoEXP, where light-responsive VP16-EL222 activates gene expression<sup>2</sup>. (b)  
 194 OptoEXP control of *PDC1* in our triple *PDC* deletion strains used for lactic acid and isobutanol  
 195 production<sup>2</sup>. (c) Lactic acid biosynthetic pathway, where *PDC1* is control with OptoEXP, and  
 196 LDH with OptoINVRT circuits<sup>2</sup>. (d) Isobutanol biosynthetic pathway, where *PDC1* is controlled  
 197 with OptoEXP and *ILV2* with OptoINVRT circuits.<sup>2</sup>

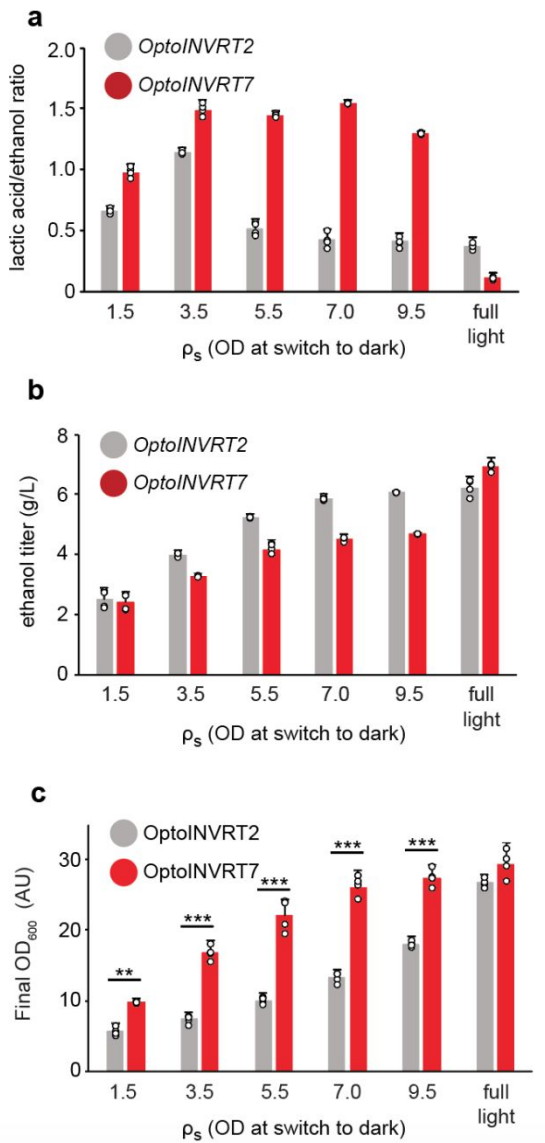

198

199 **Supplementary Figure 9. Ethanol production and cell growth during LA fermentations**

200 The ratio of lactic acid to ethanol titers **(a)**, ethanol titers **(b)**, and final cell density after 48-hour  
 201 fermentations **(c)**, measured at different  $\rho_s$  values, and using OptoINVRT2 (YEZ212C, gray) or  
 202 OptoINVRT7 (YEZ212, red). All data are shown as mean values; dots represent individual data  
 203 points; error bars represent the s.d. of four biologically independent 1-ml sample replicates  
 204 exposed to the same conditions. All experiments were repeated at least three times.



205

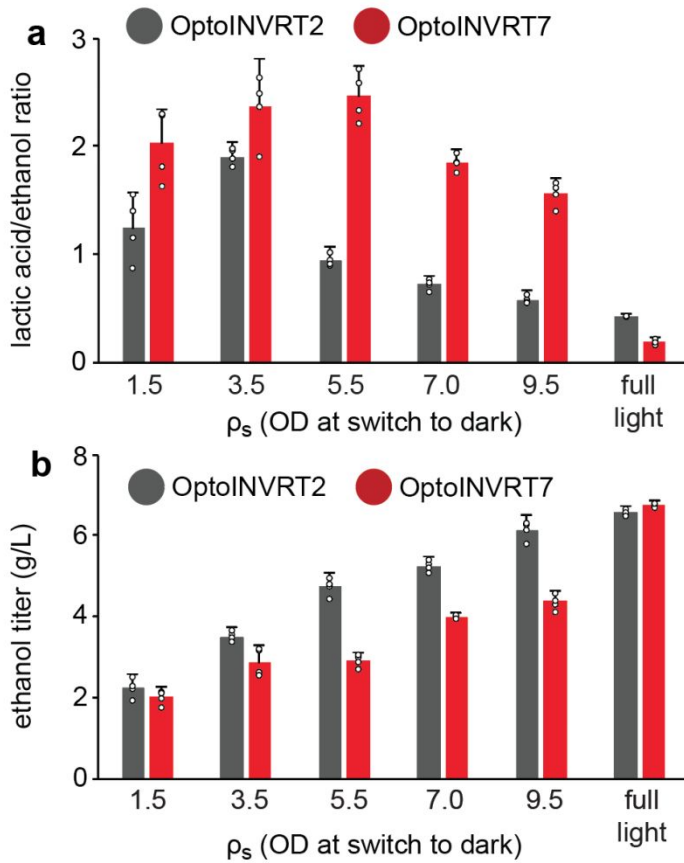

206

207 **Supplementary Figure 10. Ethanol production by OptoINVRT circuits regulating  $P_{GAL1-S}$**

208 Lactic acid to ethanol titer ratios (**a**) and ethanol titers (**b**), at different  $\rho_s$ , of strains using  $P_{GAL1-S}$

209 to express LDH, controlled by OptoINVRT2 (gray, YEZ597-5) or OptoINVRT7 (red, YEZ598-

210 4). All data are shown as mean values; dots represent individual data points; error bars represent

211 the s.d. of four biologically independent 1-ml sample replicates exposed to the same conditions.

212 All experiments were repeated at least three times.

213

214

215

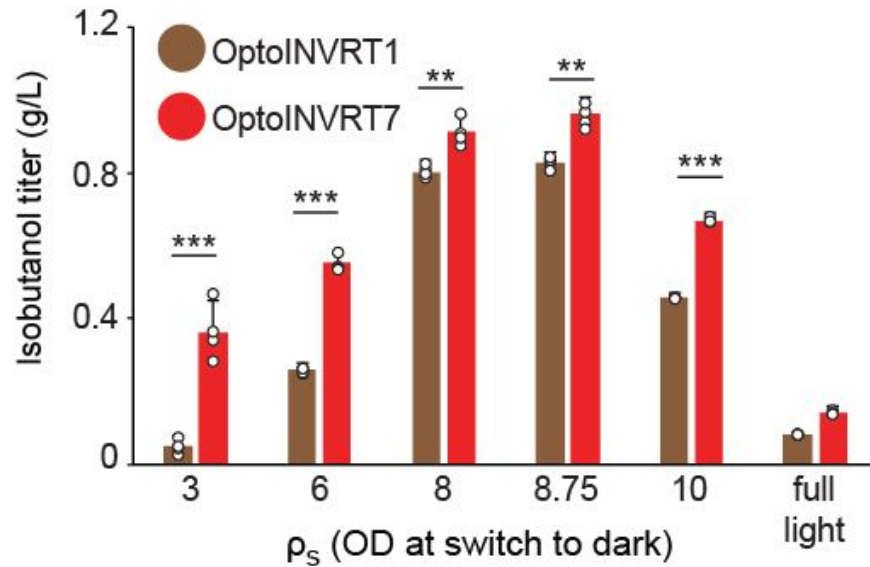

216

217 **Supplementary Figure 11. Comparison of optogenetic circuits for lactic acid and isobutanol**

218 **production.** Isobutanol production at different  $\rho_s$  values using OptoINVRT1 (YEZ544-1) and

219 OptoINVRT7 (YEZ546-2) with  $P_{GALI-M}$ ; full light samples were kept under continuous light

220 throughout growth and production phases.  $**P < 0.01$ ,  $***P < 0.001$ . Statistics are derived using

221 a one-sided  $t$ -test. All data are shown as mean values; dots represent individual data points; error

222 bars represent the s.d. of four biologically independent 1-ml sample replicates exposed to the

223 same conditions. All experiments were repeated at least three times.

224

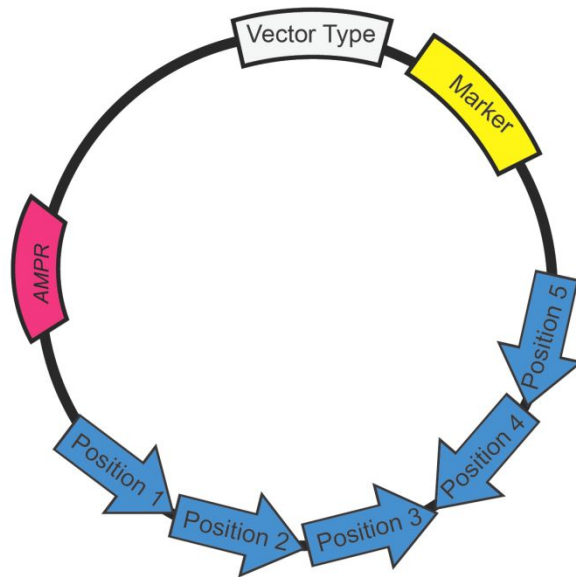

225

226 **Supplementary Figure 12. General scheme of vectors**

227 General vector map showing the relative orientation of the five positions listed in Supplementary  
228 Table 1. Different genes (including promoters and terminators) were assembled using a  
229 previously described multiple gene insertion strategy<sup>1</sup>. All vectors have an ampicillin resistance  
230 marker (*AMP<sup>R</sup>*) for cloning in *E. coli* and a selection marker for *S. cerevisiae* (Marker). Vector  
231 types include 2 $\mu$ , or integrative<sup>5-7</sup>.

232

233

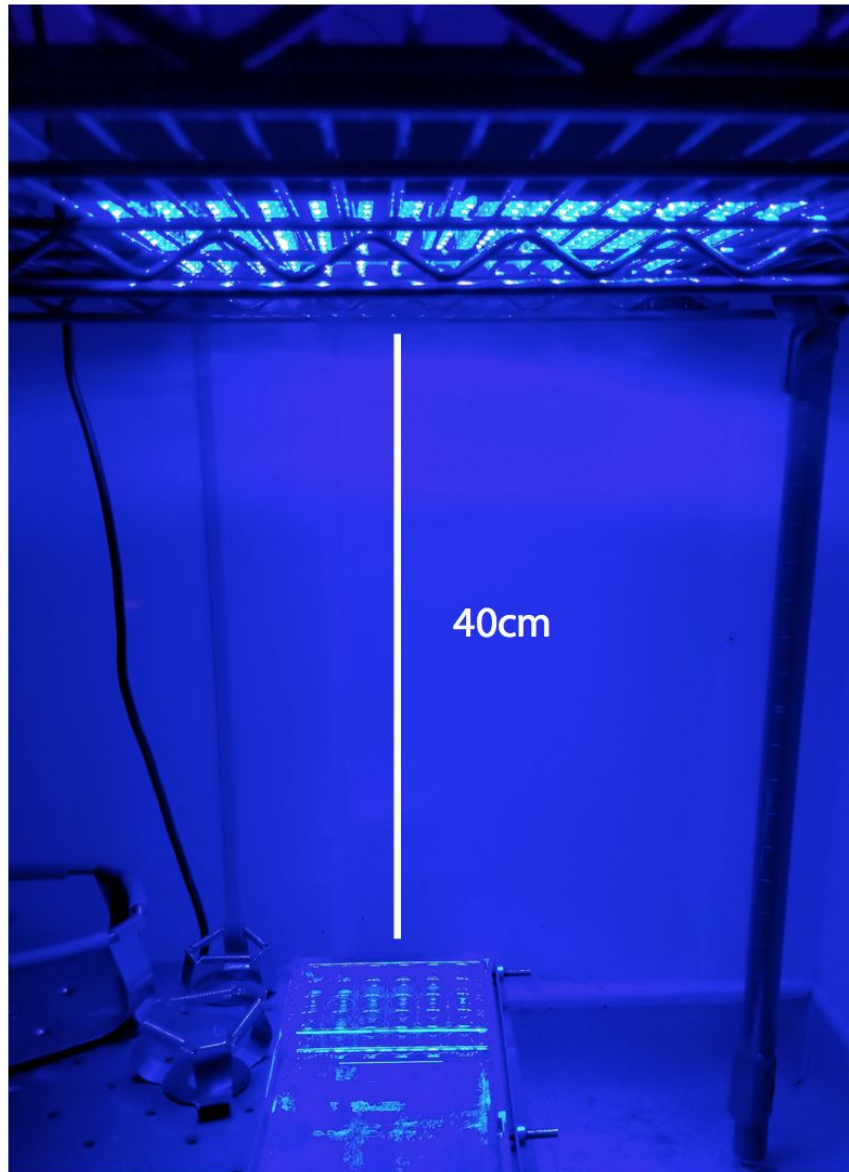

235

**236 Supplementary Figure 13. Light panel setup**

237 Picture of experimental setup for protocols involving light stimulation. Light panels were placed  
238 40 cm above 24-well plates, which were shaken at 200 RPM in a warm room (set to 30°C) with  
239 ambient lights turned off.

240

241 **Supplementary References**

- 242 1. Avalos, J. L., Fink, G. R. & Stephanopoulos, G. Compartmentalization of metabolic  
243 pathways in yeast mitochondria improves the production of branched-chain alcohols. *Nat.*  
244 *Biotechnol.* **31**, 335–341 (2013).
- 245 2. Zhao, E. M. *et al.* Optogenetic regulation of engineered cellular metabolism for microbial  
246 chemical production. *Nature* **555**, 683–687 (2018).
- 247 3. Brachmann, C. B. *et al.* Designer deletion strains derived from *Saccharomyces cerevisiae*  
248 S288C: A useful set of strains and plasmids for PCR-mediated gene disruption and other  
249 applications. *Yeast* **14**, 115–132 (1998).
- 250 4. Entian, K. D. & Kötter, P. 25 Yeast Genetic Strain and Plasmid Collections. *Methods in*  
251 *Microbiology* vol. 36 629–666 (2007).
- 252 5. Chee, M. K. & Haase, S. B. New and Redesigned pRS Plasmid Shuttle Vectors for  
253 Genetic Manipulation of *Saccharomyces cerevisiae*. *Genes|Genomes|Genetics* **2**, 515–526  
254 (2012).
- 255 6. Yuan, J. & Ching, C. B. Combinatorial Assembly of Large Biochemical Pathways into  
256 Yeast Chromosomes for Improved Production of Value-added Compounds. *ACS Synth.*  
257 *Biol.* **4**, 23–31 (2014).
- 258 7. Goldstein, A. L. & McCusker, J. H. Three new dominant drug resistance cassettes for  
259 gene disruption in *Saccharomyces cerevisiae*. *Yeast* **15**, 1541–1553 (1999).

260
